# Supplementary material for: Use of the GRADE approach in health policymaking and evaluation: a scoping review of nutrition and physical activity policies
Source: Springer Nature journal article supplement (doi:10.1186/s13012-020-00984-2), 2020-05-24
Supplement: 13012_2020_984_MOESM3_ESM.pdf [file 13012_2020_984_MOESM3_ESM.pdf]

Additional file 3: Survey among European health policy makers

| <b>Country</b>         | <b>Institution</b>                                                                                                            | <b>Use of GRADE for policy making</b>                        |
|------------------------|-------------------------------------------------------------------------------------------------------------------------------|--------------------------------------------------------------|
| Albania                | Ministry of Health                                                                                                            | --                                                           |
| Andorra                | Ministry of Health, Welfare and Family                                                                                        |                                                              |
| Armenia                | Ministry of Health                                                                                                            |                                                              |
| Austria                | Ministry of Health                                                                                                            | Not used                                                     |
| Azerbaijan             | Ministry of Health                                                                                                            |                                                              |
| Belarus                | Ministry of Health                                                                                                            |                                                              |
| Belgium                | Federal Public Service Health, Food Chain Safety and Environment                                                              | --                                                           |
| Bosnia and Herzegovina | Institute of Public Health of Federation of Bosnia and Herzegovina                                                            | Not used, but interested in using it                         |
| Bulgaria               | Ministry of Health                                                                                                            | --                                                           |
| Croatia                | Ministry of Health                                                                                                            | --                                                           |
| Cyprus                 | Ministry of Health                                                                                                            | --                                                           |
| Czech Republic         | Ministry of Health                                                                                                            | --                                                           |
| Denmark                | Ministry of Food, Agriculture and Fisheries                                                                                   | --                                                           |
| Estonia                | National Institute for Health Development                                                                                     | --                                                           |
| Finland                | National Nutrition Council                                                                                                    | --                                                           |
| France                 | Ministry of Health                                                                                                            | --                                                           |
| Georgia                | National Centre for Disease Control and Public Health                                                                         | --                                                           |
| Germany                | German Nutrition Society                                                                                                      | Nutrigrade                                                   |
| Greece                 | National and Kapodistrian University of Athens, School of Medicine - WHO Collaborating Center for Food and Nutrition Policies | --                                                           |
| Hungary                | National Institute for Food and Nutrition Science                                                                             | --                                                           |
| Iceland                | The Directorate of Health                                                                                                     | Not used, but policies are partially based on WHO guidelines |
| Ireland                | Department of Health                                                                                                          | --                                                           |
| Israel                 | Ministry of Health                                                                                                            | --                                                           |
| Italy                  | Research Centre on Food and Nutrition                                                                                         | --                                                           |
| Kazakhstan             | Ministry of Healthcare                                                                                                        |                                                              |
| Kyrgyzstan             | Ministry of Health                                                                                                            |                                                              |
| Latvia                 | Ministry of Health                                                                                                            | --                                                           |
| Lithuania              | Ministry of Health                                                                                                            | Not used                                                     |
| Luxembourg             | Ministry of Health                                                                                                            | Not used                                                     |
| Malta                  | The Health Promotion and Disease Prevention Directorate, Parliamentary Secretariat for Health                                 | --                                                           |
| Moldova                | Ministry of Health, Labour and Social Protection                                                                              |                                                              |
| Monaco                 | Ministry of Health and Social Affairs                                                                                         | Not used, refer to WHO                                       |

|                    |                                                                      | and French recommendations                    |
|--------------------|----------------------------------------------------------------------|-----------------------------------------------|
| Montenegro         | Ministry of Health                                                   |                                               |
| Netherlands        | Netherlands Nutrition Centre                                         | Not used                                      |
| North Macedonia    | Institute of Public Health                                           | --                                            |
| Northern Ireland   | Health Development Policy Branch<br>(forwarded by the NHS of the UK) | Not used                                      |
| Norway             | Directorate of Health                                                | Not used for policies,<br>only for guidelines |
| Poland             | National Food and Nutrition Institute                                | Not used                                      |
| Portugal           | Faculty of Food Sciences and Nutrition,<br>Porto University          | --                                            |
| Romania            | National Food and Nutrition Committee,<br>Ministry of Health         | --                                            |
| Russian Federation | Ministry of Health                                                   |                                               |
| San Marino         | Authority for health, socio-health and<br>socio-educational services |                                               |
| Serbia             | Ministry of Health                                                   |                                               |
| Slovakia           | Public Health Authority                                              | --                                            |
| Slovenia           | National Institute of Public Health                                  | --                                            |
| Spain              | Ministry of Health, Consumption and<br>Social Welfare                | --                                            |
| Sweden             | Ministry of Health and Social Affairs                                | --                                            |
| Switzerland        | Federal Food Safety and Veterinary Office                            | --                                            |
| Tajikistan         | Ministry of Health and Social Protection                             |                                               |
| Turkey             | Ministry of Health                                                   | --                                            |
| Turkmenistan       | Ministry of Health and Medical Industry                              |                                               |
| Ukraine            | Ministry of Health                                                   |                                               |
| United Kingdom     | National Health Service                                              | --                                            |
| Uzbekistan         | Ministry of Health                                                   |                                               |
