# Supplementary material for: Use of the GRADE approach in health policymaking and evaluation: a scoping review of nutrition and physical activity policies
Source: Springer Nature journal article supplement (doi:10.1186/s13012-020-00984-2), 2020-05-24
Supplement: 13012_2020_984_MOESM4_ESM.pdf [file 13012_2020_984_MOESM4_ESM.pdf]

## Additional file 4: WHO – Strengths and recommendations according to GRADE

| WHO Guideline                                                                                                                                           | Recommendations                                                                                                                                                                                                                                                           | Strength of recommendation |
|---------------------------------------------------------------------------------------------------------------------------------------------------------|---------------------------------------------------------------------------------------------------------------------------------------------------------------------------------------------------------------------------------------------------------------------------|----------------------------|
| Potassium intake for adults and children                                                                                                                | Increase in potassium intake from food for reduction of blood pressure and risk of cardiovascular disease, stroke and coronary heart disease in adults                                                                                                                    | Strong                     |
|                                                                                                                                                         | Potassium intake of at least 90 mmol/day (3510 mg/day) for adults                                                                                                                                                                                                         | Conditional                |
|                                                                                                                                                         | Increase in potassium intake from food to control <sup>3</sup> blood pressure in children                                                                                                                                                                                 | Conditional                |
| Sodium intake for adults and children                                                                                                                   | Reduction in sodium intake to reduce blood pressure and risk of cardiovascular disease, stroke and coronary heart disease in adults (                                                                                                                                     | Strong                     |
|                                                                                                                                                         | Reduction to <2 g/day sodium (5 g/day salt) in adults                                                                                                                                                                                                                     | Strong                     |
|                                                                                                                                                         | Reduction in sodium intake to control blood pressure in children. The recommended maximum level of intake of 2 g/day sodium in adults should be adjusted downward based on the energy requirements of children relative to those of adults.                               | Strong                     |
| Sugar intake for adults and children                                                                                                                    | Reduced intake of free sugars throughout the life course                                                                                                                                                                                                                  | Strong                     |
|                                                                                                                                                         | Reducing the intake of free sugars to less than 10% of total energy intake <sup>2</sup> in both adults and children                                                                                                                                                       | Strong                     |
|                                                                                                                                                         | Further reduction of the intake of free sugars to below 5% of total energy intake                                                                                                                                                                                         | Conditional                |
| Assessing and managing children at primary health-care facilities to prevent overweight and obesity in the context of the double burden of malnutrition | Not providing supplementary foods routinely to moderately wasted infants and children (i.e. with acute undernutrition)                                                                                                                                                    | Conditional                |
|                                                                                                                                                         | Not providing supplementary foods for treating stunting (chronic undernutrition) among infants and children                                                                                                                                                               | Conditional                |
|                                                                                                                                                         | Health workers should provide nutrition counselling to caregivers of overweight children aged less than 5 years                                                                                                                                                           | Conditional                |
|                                                                                                                                                         | Health workers should provide counselling on physical activity to caregivers of overweight children aged less than 5 years                                                                                                                                                | Conditional                |
|                                                                                                                                                         | Children aged less than 5 years who are identified as obese should be assessed and an appropriate management plan should be developed. This can be done by a health worker at primary health-care level, if adequately trained, or at a referral clinic or local hospital | Conditional                |
