# Supplementary material for: Use of the GRADE approach in health policymaking and evaluation: a scoping review of nutrition and physical activity policies
Source: Springer Nature journal article supplement (doi:10.1186/s13012-020-00984-2), 2020-05-24
Supplement: MOESM2 [file 18009274]

Additional file 2: Search in Medline via Ovid, 4<sup>th</sup> of July 2019

|    |                                                                                                                                                                                                                    |
|----|--------------------------------------------------------------------------------------------------------------------------------------------------------------------------------------------------------------------|
| 1  | exp Policy Making/                                                                                                                                                                                                 |
| 2  | ((polic* adj6 making) or (polic* adj6 evaluat*) or (health adj6 polic*) or (polic* adj6 develop*) or (polic* adj6 statement*) or (politic* adj6 strateg*)).ti,ab,kf.                                               |
| 3  | (action plan* or policy action* or (promot* adj6 health*) or (polic* adj6 intervent*) or (politic* adj6 intervent*) or (health* adj6 initiativ*) or (intervent* adj6 effic*) or (health* adj6 educati*)).ti,ab,kf. |
| 4  | or/1-3                                                                                                                                                                                                             |
| 5  | exp Nutritional Requirements/                                                                                                                                                                                      |
| 6  | exp Nutritional Policy/                                                                                                                                                                                            |
| 7  | exp diet/                                                                                                                                                                                                          |
| 8  | exp Exercise/                                                                                                                                                                                                      |
| 9  | life style/ or healthy lifestyle/ or healthy aging/ or healthy diet/ or sedentary lifestyle/                                                                                                                       |
| 10 | dedipac.mp.                                                                                                                                                                                                        |
| 11 | or/5-10                                                                                                                                                                                                            |
| 12 | 4 and 11                                                                                                                                                                                                           |
| 13 | (grade or grading or recommend* or guideline*).ti,ab,kf.                                                                                                                                                           |
| 14 | evidence-based practice/ or evidence-based medicine/                                                                                                                                                               |
| 15 | 13 or 14                                                                                                                                                                                                           |
| 16 | 12 and 15                                                                                                                                                                                                          |
